# Supplementary material for: Biosynthesis of Polyhydroxybutyrate with Cellulose Nanocrystals Using Cupriavidus necator
Source: MDPI journal article supplement (doi:10.3390/polym13162604), 2021-08-05
Supplement: s1 [file s1]

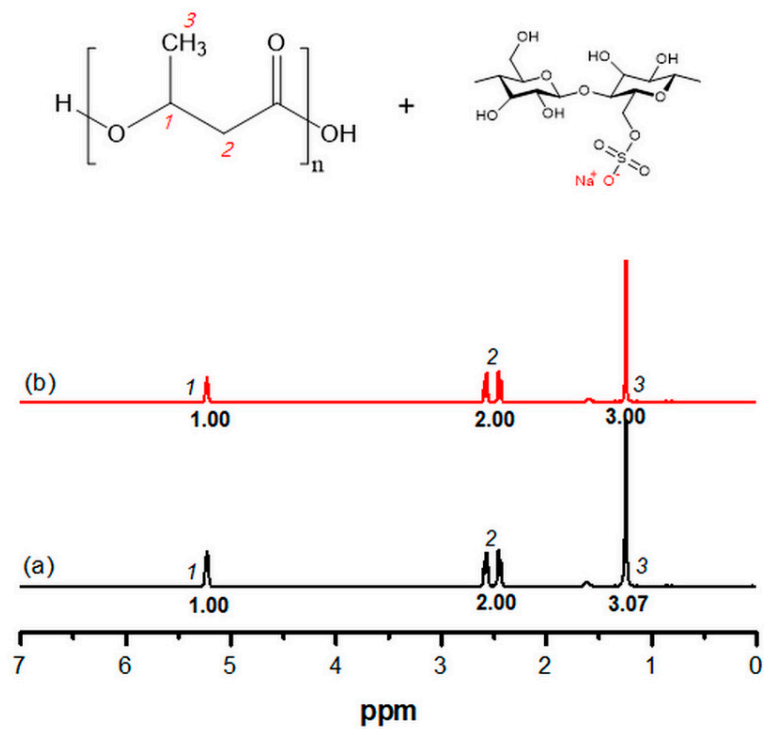

Figure S1.  $^1\text{H}$  NMR spectra of PHB (a) without CNC and (b) with 0.1 g/L CNC.

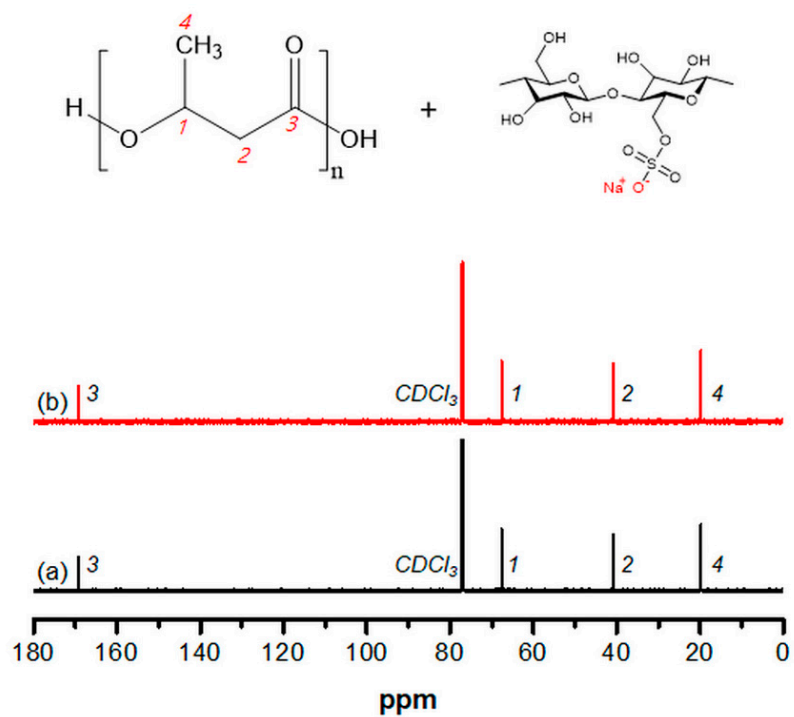

Figure S2.  $^{13}\text{C}$  NMR spectra of PHB (a) without CNC and (b) with 0.1 g/L CNC.
